# Supplementary material for: Fabrication of lignin nanospheres by emulsification in a binary γ-valerolactone/glycerol system and their application as a bifunctional reducer and carrier for Pd nanoparticles with enhanced catalytic activity
Source: Royal Society of Chemistry journal article supplement (doi:10.1039/d0gc02424d), 2020-01-01
Supplement: d0gc02424d1.pdf [file d0gc02424d1.pdf]

**Fabrication of lignin nanosphere by emulsification in binary  $\gamma$ -valerolactone/glycerol system and its application as a bifunctional reducer and carrier for Pd nanoparticles with enhanced catalytic activity**

Guanhua Wang <sup>a,b\*</sup>, Tairan Pang <sup>a</sup>, Shilin Chen <sup>a</sup>, Wenjie Sui <sup>c</sup>, Chuanling Si <sup>a\*</sup>, Yonghao Ni <sup>b\*</sup>

<sup>a</sup> Tianjin Key Laboratory of Pulp and Paper, College of Light Industry Science and Engineering,

Tianjin University of Science and Technology, Tianjin 300457, China

<sup>b</sup> Limerick Pulp & Paper Centre & Department of Chemical Engineering, University of New

Brunswick, Fredericton, NB, E3B 5A3, Canada

<sup>c</sup> State Key Laboratory of Food Nutrition and Safety, College of Food Science and Engineering,

Tianjin University of Science & Technology, Tianjin 300457, China.

\* Corresponding author. Tel.: +86 02260601313

Address: No.29 at 13th Avenue, TEDA, Tianjin 300457, China

E-mail address: [ghwang@tust.edu.cn](mailto:ghwang@tust.edu.cn) (Guanhua Wang)

[sichli@tust.edu.cn](mailto:sichli@tust.edu.cn) (Chuanling Si)

[yonghao@unb.ca](mailto:yonghao@unb.ca) (Yonghao Ni)

Fig. S1

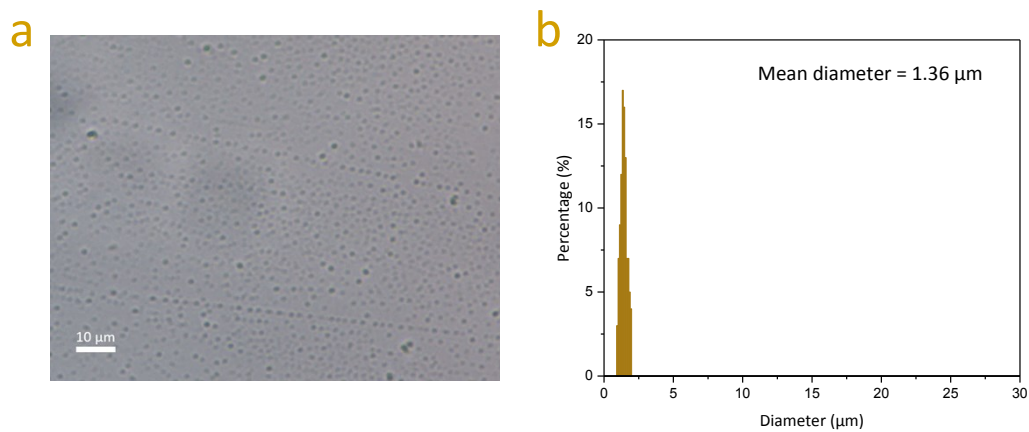

**Figure S1.** Microscopic photo of lignin-containing GVL droplets after cooling to room temperature (A) and their size distribution (B).

Fig. S2

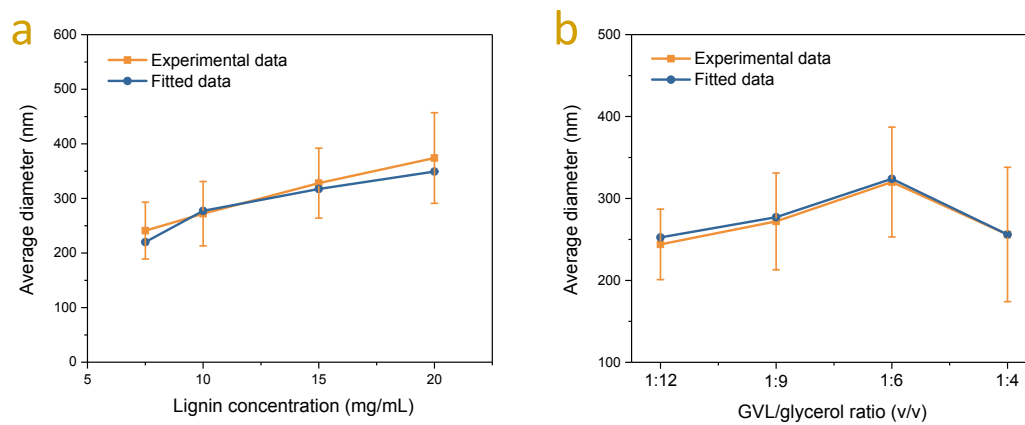

**Figure S2.** Comparison of the experimental data and the fitted data on the particle size of lignin nanospheres obtained under varied preparation conditions: (a) different initial lignin concentration (mg/mL) and (b) different GVL/glycerol ratio (v/v)

Fig. S3

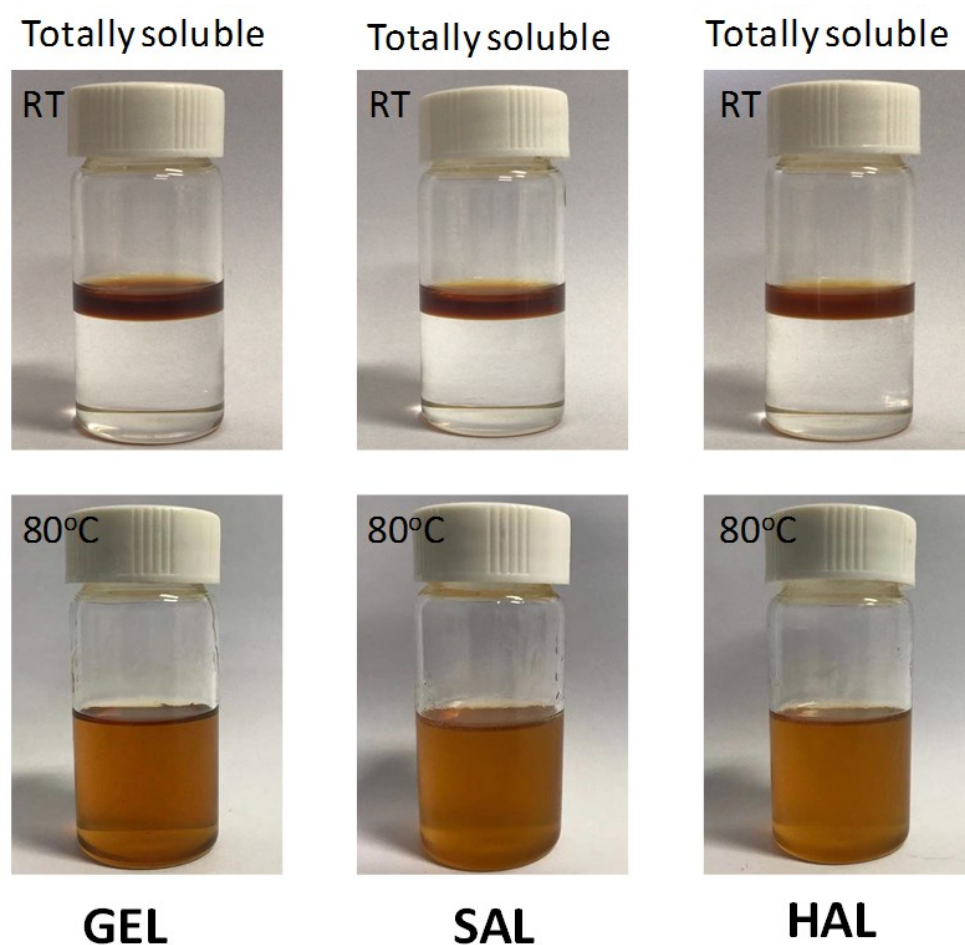

**Figure S3.** Pictures of dissolution of ethanol lignin from corn stalk (GEL), alkaline lignin from pine (SAL), and alkaline lignin from poplar (HAL) in binary GVL/glycerol solvent system at room temperature and 80 °C, respectively.

Fig. S4

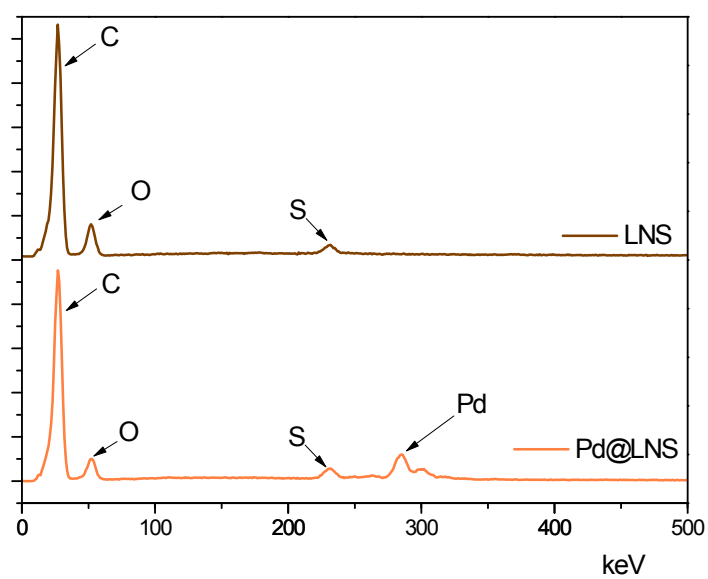

**Figure S4.** Energy dispersive X-ray (EDX) analysis of Pd@LNS and pure LNS

Fig. S5

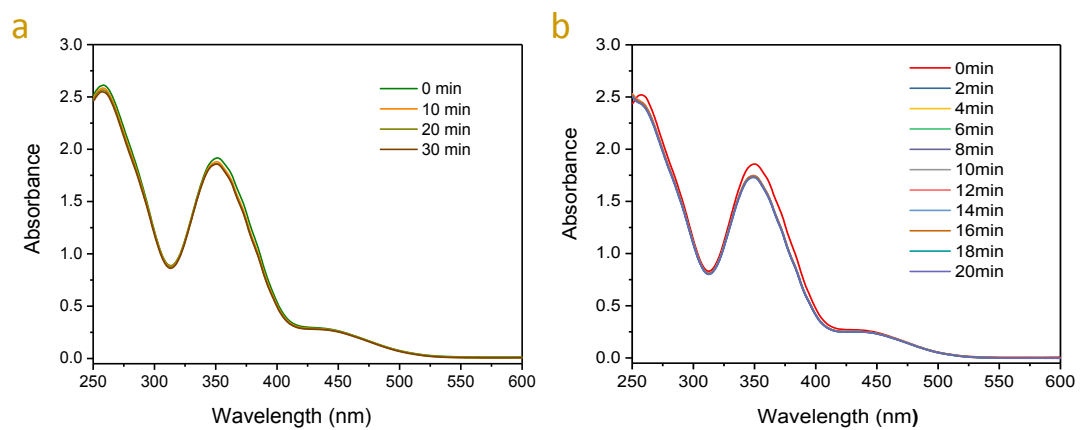

**Figure S5.** Variation of time dependent UV-vis spectra for Cr(VI) aqueous solution treated with

LNS only (a) and formic acid only (b).

Fig. S6

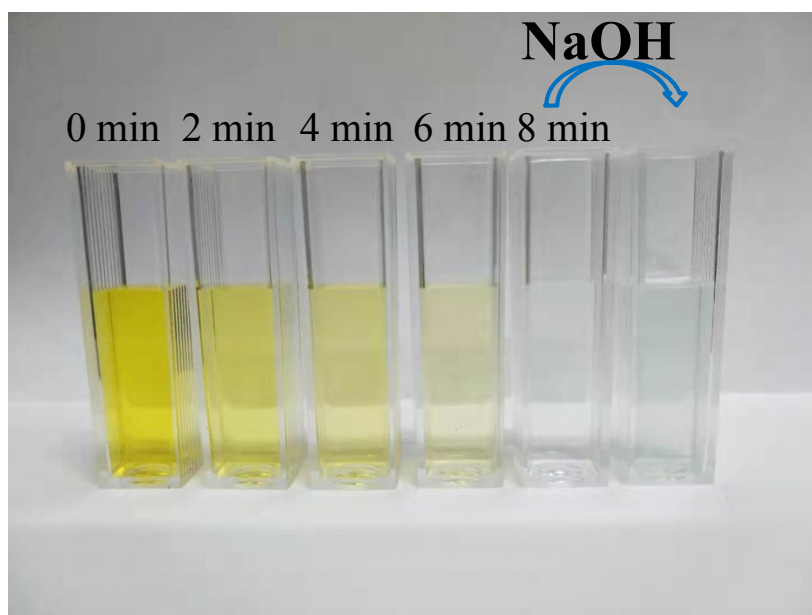

**Figure S6.** Photographic illustrations of color change of aqueous Cr(VI) solution by Pd@LNS catalytic reduction in the presence of formic acid.

Fig. S7

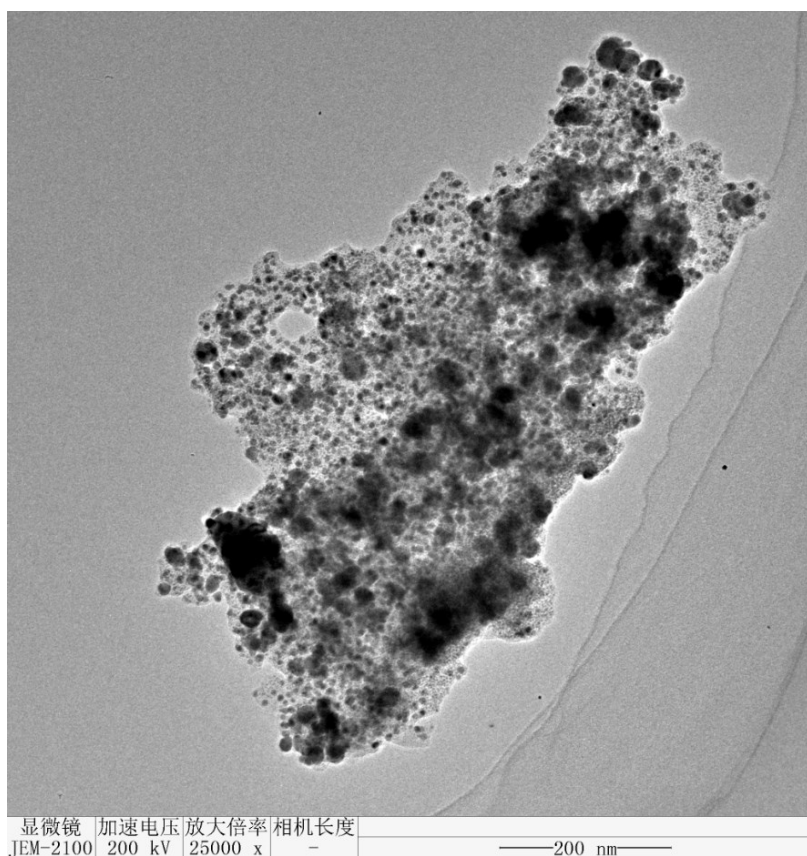

**Figure S7.** TEM image of bare Pd NPs without LNS supporting, obvious aggregations were observed, resulting in much larger particle size.



Fig. S8

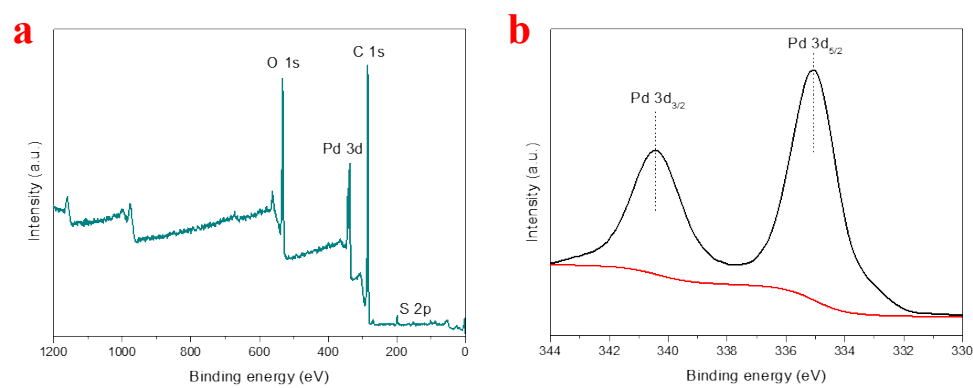

**Figure S8.** (a) XPS survey spectrum of Pd@LNS, (b) high resolution XPS spectrum of Pd 3d for Pd@LNS after eight recycled tests.
